# Supplementary material for: Single-step preparation of recyclable silver nanoparticle immobilized porous glass filters for the catalytic reduction of nitroarenes
Source: Royal Society of Chemistry journal article supplement (doi:10.1039/c4ra16541a), 2015-01-01
Supplement: c4ra16541a1.pdf [file c4ra16541a1.pdf]

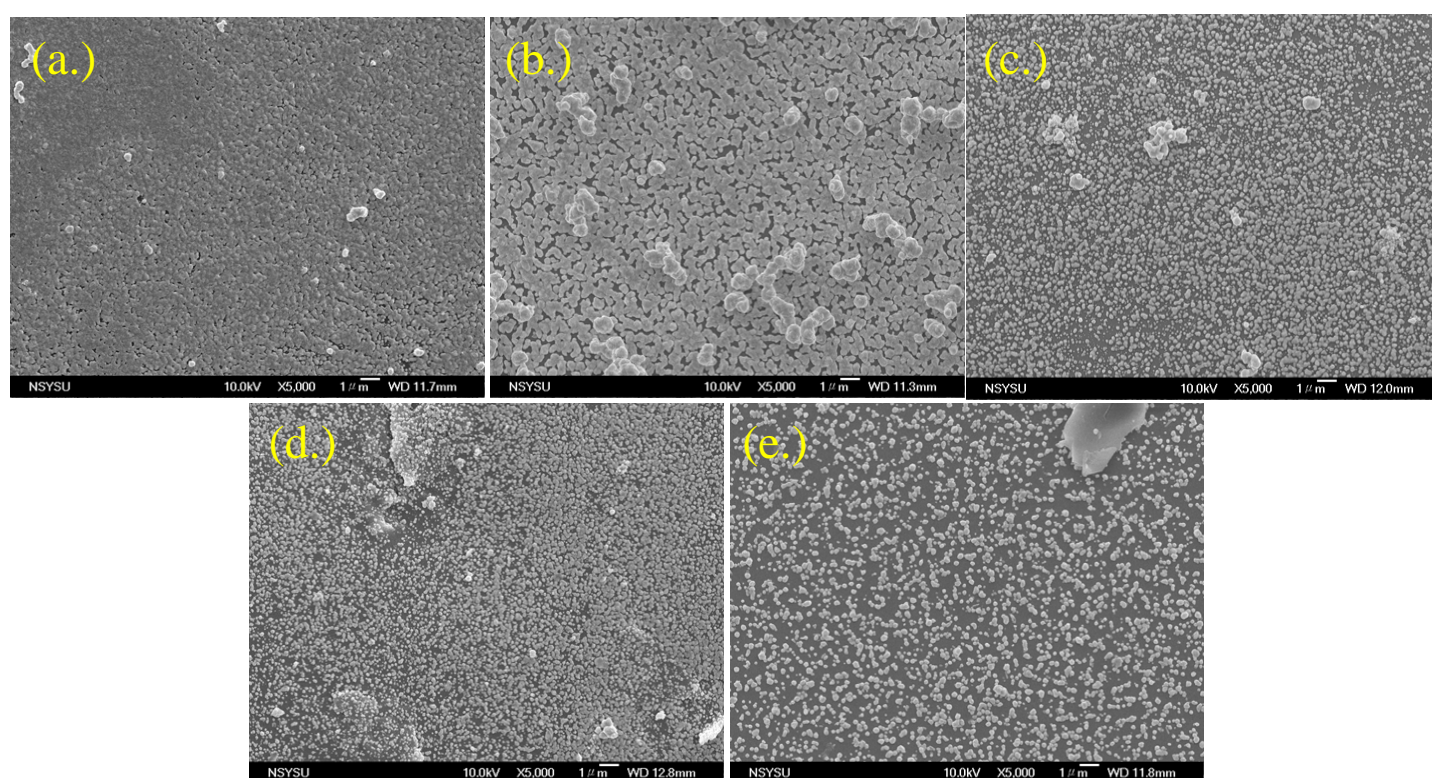

**Figure S1.** SEM images of silver nanoparticles reduced on the sintered glass filter with a  $\text{Ag}^+$  concentration of (a) 225 mM, (b) 187.5 mM, (c) 150 mM, (d) 75 mM, and (e) 37.5 mM. The concentration ratio of the  $\text{Ag}^+$ :ammonia:dextrose was fixed at 1:6:10, and the deposition was held in a 55 °C water bath for 10 min. The porosity of the glass filter was 40–100 mm, and the magnification of the images were all 5000x.

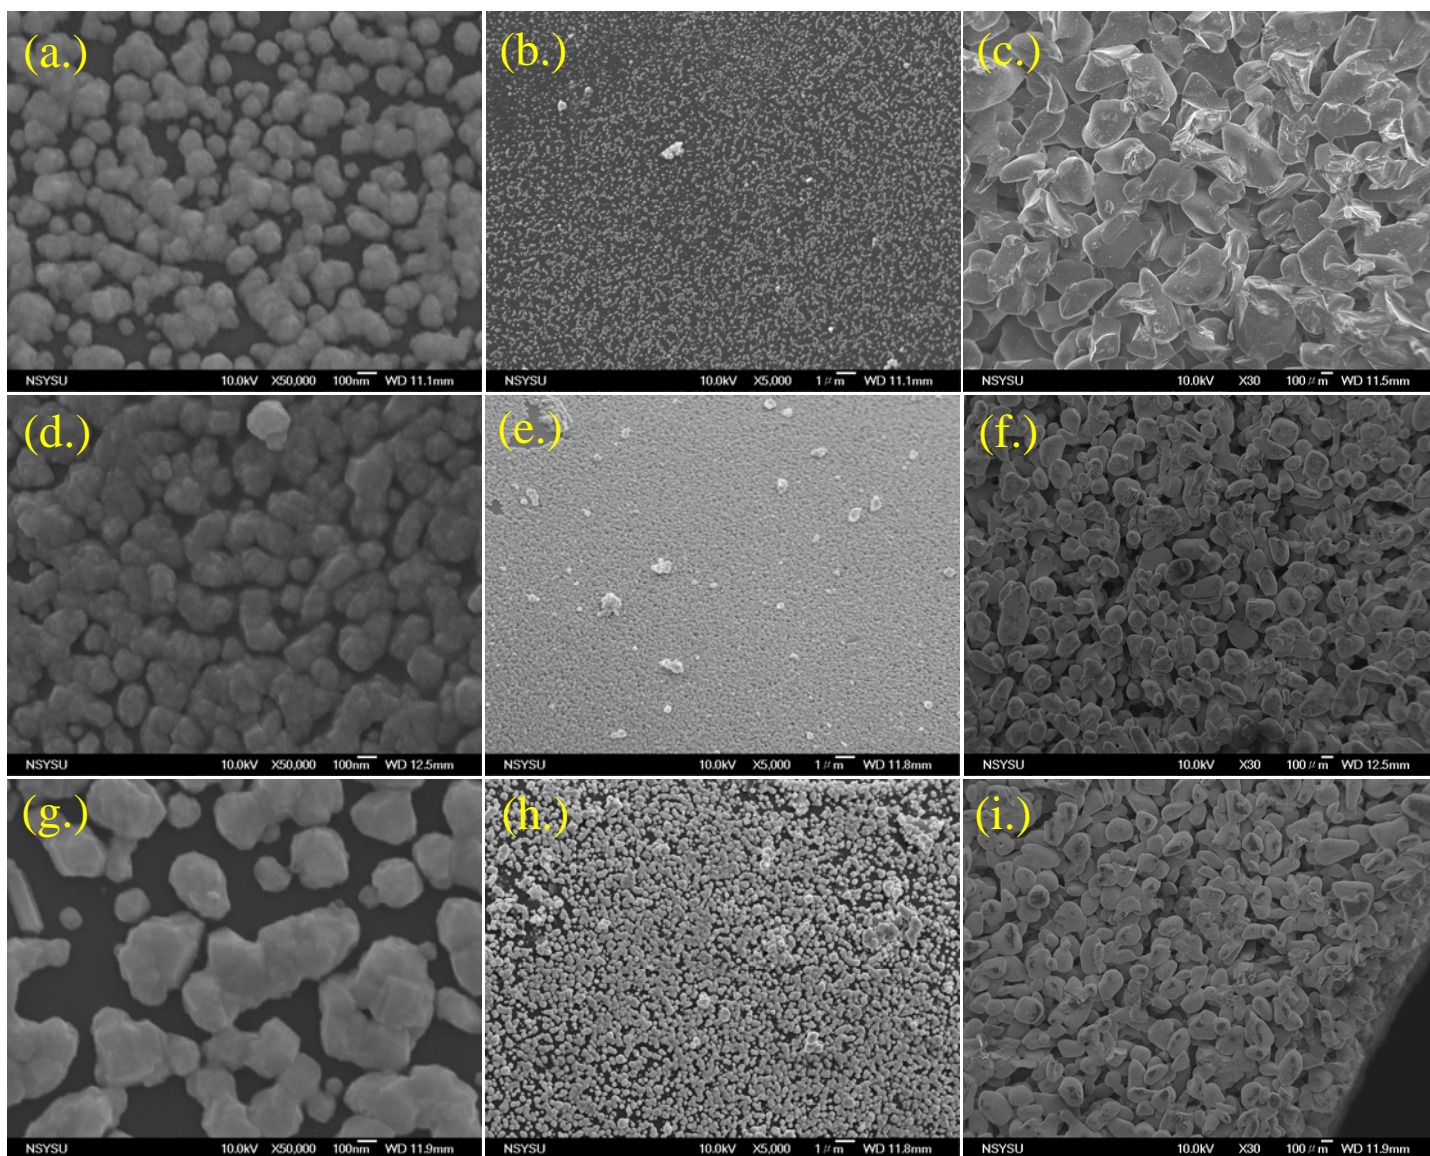

**Figure S2.** SEM images of silver nanoparticles reduced on the different porosities of sintered glass filter with different magnifications. The porosity of the glass filter is (a.)~(c.) 100-160  $\mu\text{m}$ , (d.)~(f.) 40-100  $\mu\text{m}$ , and (g.)~(i.) 16-40  $\mu\text{m}$  where the magnification of (a.),(d),(g) are 50000x, (b.),(e),(h) are 5000x and (c.),(f),(i) are 30x. The concentration of  $\text{Ag}^+$  in Tollen's reagent is 150 mM and the ratio of  $\text{Ag}^+$ :ammonia:dextrose was fixed at 1: 6: 10. The deposition of silver nanoparticles was held in a 55°C water bath for 10 minutes.

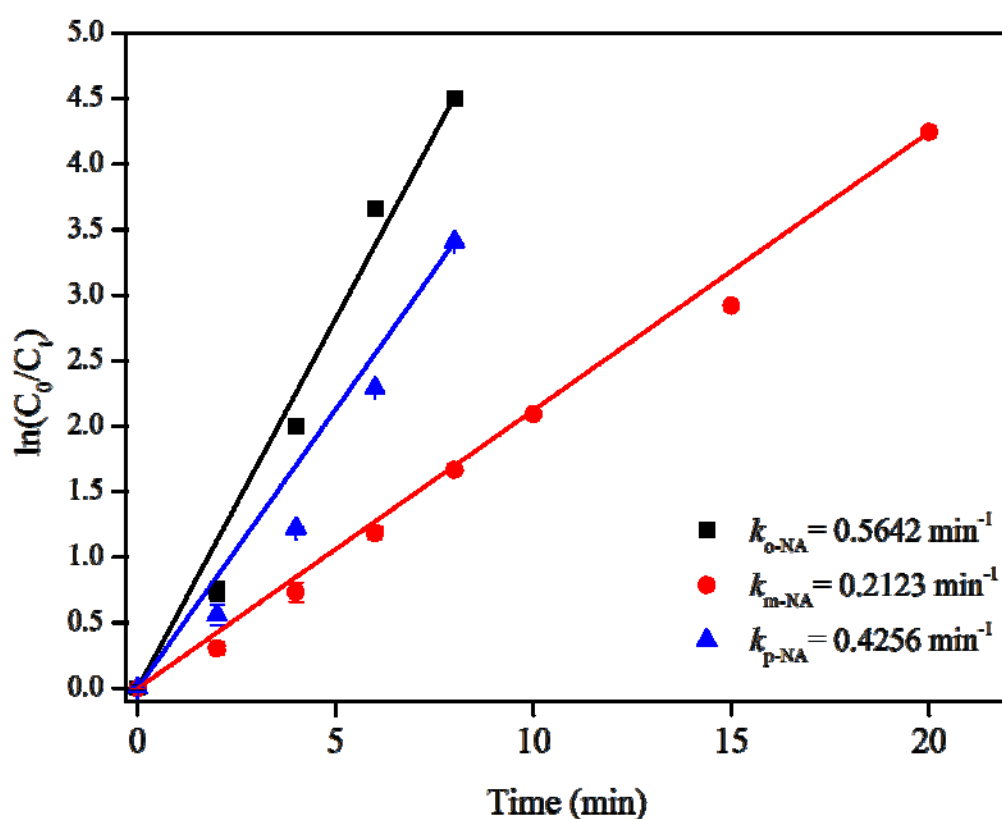

**Figure S3.** The relation between  $\ln(C_0/C_t)$  of three nitroaniline isomers (■: o-NA, ●: m-NA, and ▲: p-NA) against the reaction time. against the reaction time reduced by 30 mM  $\text{NaBH}_4$  in the presence of glass-filter supported nanoparticles at 50 °C. The pH of the solution was 10, and the silver nanoparticles immobilized glass-filter fabrication condition was the same as described in Figure 1(c).

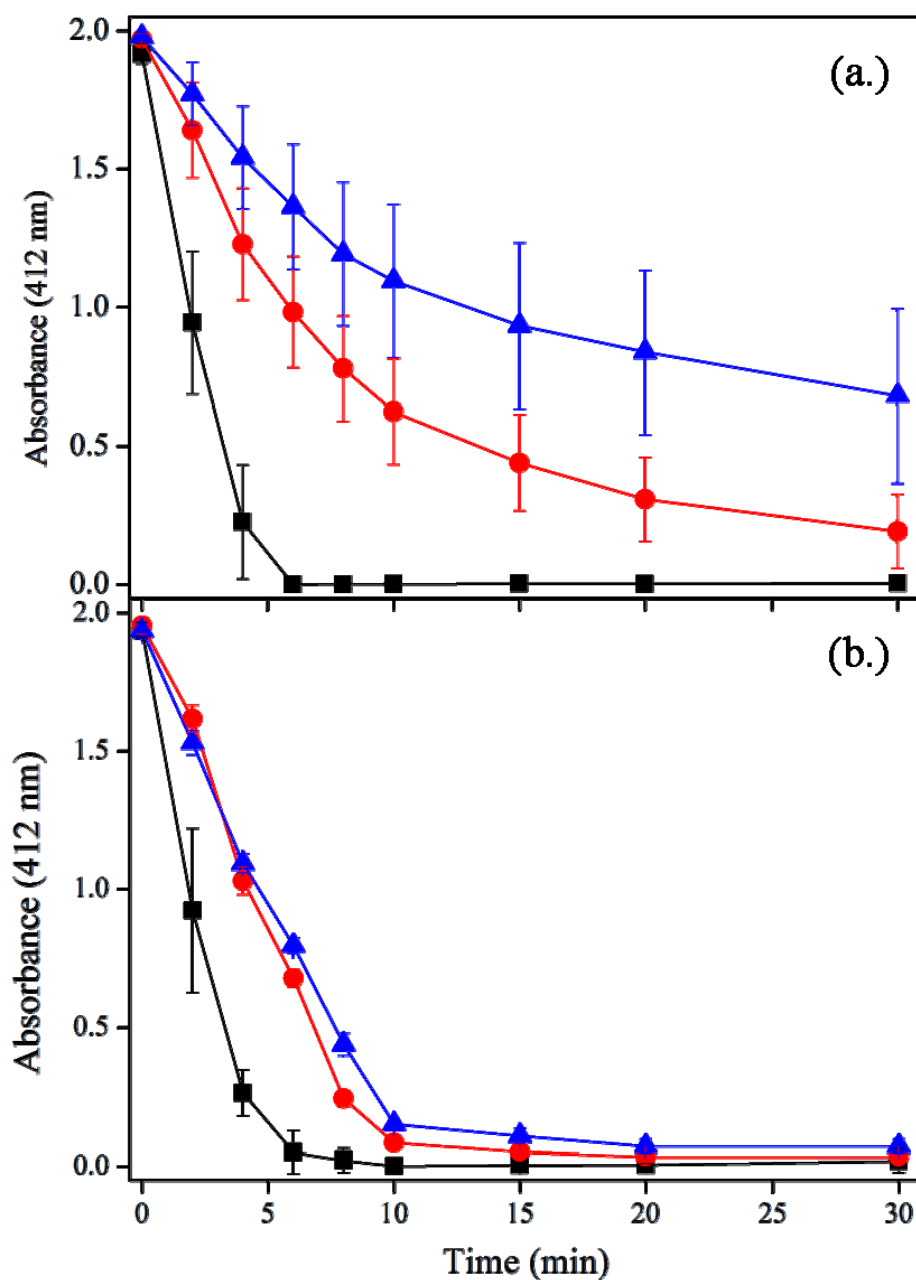

**Figure S4.** (a.) The absorption time profile of 1 mM o-NA(■: first run, ●: second run , and ▲: third run) reduced by 30 mM NaBH<sub>4</sub> in the presence of glass-filter supported nanoparticles at 50 °C, where the silver nanocatalysts were consecutively reusing for three times. The pH of the solution was 10, and the silver nanoparticles immobilized glass-filter fabrication condition was the same as described in Figure 1(c). (b.) The absorption time profile of 1 mM o-NA(■: first run, ●: second run , and ▲: third run) catalyzed by glass-filter supported silver nanoparticles, where the silver nanocatalysts were treated with acidic water solution (pH=3) for 20 min then immersed with neutral water before recycled.
